# Supplementary material for: A Novel Solid Phase Extraction Sample Preparation Method for Lipidomic Analysis of Human Plasma Using Liquid Chromatography/Mass Spectrometry
Source: Metabolites. 2021 May 4;11(5):294. doi: 10.3390/metabo11050294 (PMC8147762; doi:10.3390/metabo11050294)
Supplement: Supplementary file 1 [file metabolites-11-00294-s001.zip › Supplementary Table S2.xlsx]

## Sheet: Sheet1
Compound Name	Precursor Ion (m/z)	Product Ion (m/z)	CE (V)	Ret Time (min)	Polarity	Adduct	Product Ion Name
CE 14:1 d7	619.6	376.4	10	11.274	Positive	[M+NH4]+	-FA 14:1(+HO)-Cholesterol
CE 16:1 d7	647.7	376.4	10	11.628	Positive	[M+NH4]+	-FA 16:1(+HO)-Cholesterol
CE 18:1 d7	675.7	376.4	5	12.066	Positive	[M+NH4]+	-FA 18:1(+HO)-Cholesterol
CE 20:3 d7	699.7	376.4	10	11.722	Positive	[M+NH4]+	-FA 20:3(+HO)-Cholesterol
CE 22:4 d7	725.7	376.4	10	11.778	Positive	[M+NH4]+	-FA 22:4(+HO)-Cholesterol
Cer d18:1_d7_16:1	543.6	525.5	8	5.062	Positive	[M+H]+	-(H2O)
Cer d18:1_d7_16:1	543.6	271.2	20	5.062	Positive	[M+H]+	LCB 18:1;2(+d7)(-H3O2)
Cer d18:1_d7_18:1	571.6	553.5	8	6.261	Positive	[M+H]+	-(H2O)
Cer d18:1_d7_18:1	571.6	271.2	28	6.261	Positive	[M+H]+	LCB 18:1;2(+d7)(-H3O2)
Cer d18:1_d7_20:1	599.6	581.5	8	7.755	Positive	[M+H]+	-(H2O)
Cer d18:1_d7_20:1	599.6	271.2	24	7.755	Positive	[M+H]+	LCB 18:1;2(+d7)(-H3O2)
Cer d18:1_d7_22:1	627.6	609.5	8	9.168	Positive	[M+H]+	-(H2O)
Cer d18:1_d7_22:1	627.6	271.2	32	9.168	Positive	[M+H]+	LCB 18:1;2(+d7)(-H3O2)
Cer d18:1_d7_24:1	655.7	637.6	12	9.684	Positive	[M+H]+	-(H2O)
Cer d18:1_d7_24:1	655.7	271.3	28	9.684	Positive	[M+H]+	LCB 18:1;2(+d7)(-H3O2)
DG 17:0_14:1 d5	575.5	540.5	20	6.897	Positive	[M+NH4]+	-(H2O+NH3)
DG 17:0_14:1 d5	575.5	332.3	20	6.897	Positive	[M+NH4]+	-FA 14:1(-H)-(H2O+NH3)
DG 17:0_16:1 d5	603.6	332.2	20	8.61	Positive	[M+NH4]+	-FA 16:1(-H)-(H2O+NH3)
DG 17:0_16:1 d5	603.6	316.2	20	8.61	Positive	[M+NH4]+	-FA 17:0(-H)-(H2O+NH3)
DG 17:0_18:1 d5	631.6	596.5	20	9.436	Positive	[M+NH4]+	-(H2O+NH3)
DG 17:0_18:1 d5	631.6	332.3	20	9.436	Positive	[M+NH4]+	-FA 1:18(-H)-(H2O+NH3)
DG 17:0_20:3 d5	655.6	620.4	20	9.209	Positive	[M+NH4]+	-(H2O+NH3)
DG 17:0_20:3 d5	655.6	332.4	20	9.209	Positive	[M+NH4]+	-FA 20:3(-H)-(H2O+NH3)
DG 17:0_22:4 d5	664.6	394.2	20	9.327	Positive	[M+NH4]+	-FA 17:0(-H)-(H2O+NH3)
DG 17:0_22:4 d5	664.6	332.3	20	9.327	Positive	[M+NH4]+	-FA 22:4(-H)-(H2O+NH3)
LPC 15:0 d5	487.4	184	30	1.696	Positive	[M+H]+	HG(PC)
LPC 15:0 d5	487.4	104	24	1.696	Positive	[M+H]+	(C5H13NO)
LPC 17:0 d5	515.4	184	30	2.191	Positive	[M+H]+	HG(PC)
LPC 17:0 d5	515.4	104	24	2.191	Positive	[M+H]+	(C5H13NO)
LPC 19:0 d5	543.4	184	28	2.648	Positive	[M+H]+	HG(PC)
LPC 19:0 d5	543.4	104	28	2.648	Positive	[M+H]+	(C5H13NO)
LPE 15:0 d5	445.3	304.3	12	1.718	Positive	[M+H]+	-HG(PE)
LPE 17:0 d5	473.3	332.3	20	2.215	Positive	[M+H]+	-HG(PE)
LPE 19:0 d5	501.4	360.3	20	2.661	Positive	[M+H]+	-HG(PE)
LPG 15:0 d5	476.3	304.4	8	1.757	Positive	[M+H]+	-HG(PG)
LPG 17:0 d5	504.3	332	20	2.252	Positive	[M+H]+	-HG(PG)
LPG 19:0 d5	532.4	360.3	16	2.692	Positive	[M+H]+	-HG(PG)
LPI 15:0 d5	564.3	546.3	5	1.484	Positive	[M+H]+	-(H2O)
LPI 15:0 d5	564.3	528.3	10	1.484	Positive	[M+H]+	-(2*H2O)
LPI 17:0 d5	592.4	574.3	5	1.844	Positive	[M+H]+	-(H2O)
LPI 17:0 d5	592.4	556.3	10	1.844	Positive	[M+H]+	-(2*H2O)
LPI 19:0 d5	620.4	602.4	5	2.287	Positive	[M+H]+	-(H2O)
LPI 19:0 d5	620.4	584.4	10	2.287	Positive	[M+H]+	-(2*H2O)
LPS 15:0 d5	489.3	384.3	6	1.399	Positive	[M+H]+	-(C3H7NO3)
LPS 15:0 d5	489.3	304.3	16	1.399	Positive	[M+H]+	FA 15:0 d5
LPS 17:0 d5	517.3	412.3	16	1.856	Positive	[M+H]+	-(C3H7NO3)
LPS 17:0 d5	517.3	332.3	16	1.856	Positive	[M+H]+	FA 17:0 d5
LPS 19:0 d5	545.4	440.4	16	2.31	Positive	[M+H]+	-(C3H7NO3)
LPS 19:0 d5	545.4	360.4	20	2.31	Positive	[M+H]+	FA 19:0 d5
PC 17:0_14:1 d5	723.6	184	28	4.595	Positive	[M+H]+	HG(PC)
PC 17:0_14:1 d5	723.6	125.1	50	4.595	Positive	[M+H]+	HG(PC)-(NH3)
PC 17:0_16:1 d5	751.6	184	28	5.529	Positive	[M+H]+	HG(PC)
PC 17:0_16:1 d5	751.6	125.1	50	5.529	Positive	[M+H]+	HG(PC)-(NH3)
PC 17:0_18:1 d5	779.6	184	28	6.8	Positive	[M+H]+	HG(PC)
PC 17:0_18:1 d5	779.6	125	48	6.8	Positive	[M+H]+	HG(PC)-(NH3)
PC 17:0_20:3 d5	803.6	184	32	6.216	Positive	[M+H]+	HG(PC)
PC 17:0_20:3 d5	803.6	124.9	50	6.216	Positive	[M+H]+	HG(PC)-(NH3)
PC 17:0_22:4 d5	829.7	184	28	6.709	Positive	[M+H]+	HG(PC)
PC 17:0_22:4 d5	829.7	124.8	50	6.709	Positive	[M+H]+	HG(PC)-(NH3)
PE 17:0_14:1 d5	681.5	540.5	20	4.718	Positive	[M+H]+	-HG(PE)
PE 17:0_16:1 d5	709.6	568.6	20	5.714	Positive	[M+H]+	-HG(PE)
PE 17:0_18:1 d5	737.6	596.5	20	7.074	Positive	[M+H]+	-HG(PE)
PE 17:0_20:3 d5	761.6	620.6	16	6.45	Positive	[M+H]+	-HG(PE)
PE 17:0_22:4 d5	787.6	646.6	20	6.937	Positive	[M+H]+	-HG(PE)
PG 17:0_14:1 d5	729.5	540.5	10	3.774	Positive	[M+NH4]+	-HG(PG)
PG 17:0_14:1 d5	712.5	540.5	10	3.774	Positive	[M+H]+	-HG(PG)
PG 17:0_16:1 d5	757.6	568.5	10	4.369	Positive	[M+NH4]+	-HG(PG)
PG 17:0_16:1 d5	740.5	568.5	10	4.369	Positive	[M+H]+	-HG(PG)
PG 17:0_18:1 d5	785.6	596.6	20	5.213	Positive	[M+NH4]+	-HG(PG)
PG 17:0_18:1 d5	768.6	596.6	10	5.213	Positive	[M+H]+	-HG(PG)
PG 17:0_20:3 d5	809.6	620.6	10	4.831	Positive	[M+NH4]+	-HG(PG)
PG 17:0_20:3 d5	792.6	620.6	10	4.831	Positive	[M+H]+	-HG(PG)
PG 17:0_22:4 d5	835.6	646.6	20	5.134	Positive	[M+NH4]+	-HG(PG)
PG 17:0_22:4 d5	818.6	646.6	20	5.134	Positive	[M+H]+	-HG(PG)
PI 17:0_14:1 d5	817.6	540.5	25	3.636	Positive	[M+NH4]+	-HG(PI)
PI 17:0_14:1 d5	800.5	540.5	10	3.636	Positive	[M+H]+	-HG(PI)
PI 17:0_16:1 d5	845.6	568.5	20	4.206	Positive	[M+NH4]+	-HG(PI)
PI 17:0_16:1 d5	828.6	568.5	15	4.206	Positive	[M+H]+	-HG(PI)
PI 17:0_18:1 d5	873.6	596.6	10	4.996	Positive	[M+NH4]+	-HG(PI)
PI 17:0_18:1 d5	856.6	596.5	10	4.996	Positive	[M+H]+	-HG(PI)
PI 17:0_20:3 d5	897.6	620.6	20	4.657	Positive	[M+NH4]+	-HG(PI)
PI 17:0_20:3 d5	880.6	620.6	15	4.657	Positive	[M+H]+	-HG(PI)
PI 17:0_22:4 d5	923.6	646.6	15	4.927	Positive	[M+NH4]+	-HG(PI)
PI 17:0_22:4 d5	906.6	646.6	15	4.927	Positive	[M+H]+	-HG(PI)
PS 17:0_14:1 d5	725.5	540.5	20	3.69	Positive	[M+H]+	-HG(PS)
PS 17:0_16:1 d5	753.5	568.5	20	4.291	Positive	[M+H]+	-HG(PS)
PS 17:0_18:1 d5	781.6	596.5	24	5.1	Positive	[M+H]+	-HG(PS)
PS 17:0_20:3 d5	805.6	620.4	20	4.776	Positive	[M+H]+	-HG(PS)
PS 17:0_22:4 d5	831.6	646.5	16	5.307	Positive	[M+H]+	-HG(PS)
SM d18:1_16:1 d9	710.6	193.2	28	4.107	Positive	[M+H]+	HG(PC)
SM d18:1_16:1 d9	710.6	125	50	4.107	Positive	[M+H]+	HG(PC)-N(CD3)3
SM d18:1_18:1 d9	738.7	193.2	28	4.931	Positive	[M+H]+	HG(PC)
SM d18:1_18:1 d9	738.7	125	50	4.931	Positive	[M+H]+	HG(PC)-N(CD3)3
SM d18:1_20:1 d9	766.7	193.2	24	5.92	Positive	[M+H]+	HG(PC)
SM d18:1_20:1 d9	766.7	125	50	5.92	Positive	[M+H]+	HG(PC)-N(CD3)3
SM d18:1_22:1 d9	794.7	193.2	24	7.363	Positive	[M+H]+	HG(PC)
SM d18:1_22:1 d9	794.7	125	50	7.363	Positive	[M+H]+	HG(PC)-N(CD3)3
SM d18:1_24:1 d9	822.7	193.2	28	9.018	Positive	[M+H]+	HG(PC)
SM d18:1_24:1 d9	822.7	125	50	9.018	Positive	[M+H]+	HG(PC)-N(CD3)3
TG 14:0_14:0_13:0 d5	731.7	500.5	15	10.71	Positive	[M+NH4]+	-FA 13:0(+HO)-(NH3)
TG 14:0_14:0_13:0 d5	731.7	486.5	19	10.71	Positive	[M+NH4]+	-FA 14:0(+HO)-(NH3)
TG 14:0_14:0_15:1 d5	757.7	512.5	23	10.727	Positive	[M+NH4]+	-FA 14:0(+HO)-(NH3)
TG 14:0_14:0_15:1 d5	757.7	500.4	20	10.727	Positive	[M+NH4]+	-FA 15:1(+HO)-(NH3)
TG 14:0_14:0_17:1 d5	785.7	540.5	15	10.973	Positive	[M+NH4]+	-FA 14:0(+HO)-(NH3)
TG 14:0_14:0_17:1 d5	785.7	500.5	15	10.973	Positive	[M+NH4]+	-FA 13:0(+HO)-(NH3)
TG 16:0_16:0_15:1 d5	813.8	556.5	23	11.257	Positive	[M+NH4]+	-FA 15:1(+HO)-(NH3)
TG 16:0_16:0_15:1 d5	813.8	540.5	27	11.257	Positive	[M+NH4]+	-FA 16:0(+HO)-(NH3)
TG 16:0_16:0_17:1 d5	841.8	568.5	23	11.542	Positive	[M+NH4]+	-FA 16:0(+HO)-(NH3)
TG 16:0_16:0_17:1 d5	841.8	556.5	19	11.542	Positive	[M+NH4]+	-FA 17:1(+HO)-(NH3)
TG 16:0_16:0_19:2 d5	867.8	594.6	19	11.56	Positive	[M+NH4]+	-FA 16:0(+HO)-(NH3)
TG 16:0_16:0_19:2 d5	867.8	556.5	23	11.56	Positive	[M+NH4]+	-FA 19:2(+HO)-(NH3)
TG 18:1_18:1_17:1 d5	893.8	608.6	23	11.56	Positive	[M+NH4]+	-FA 17:1(+HO)-(NH3)
TG 18:1_18:1_17:1 d5	893.8	594.6	19	11.56	Positive	[M+NH4]+	-FA 18:1(+HO)-(NH3)
TG 18:1_18:1_19:2 d5	919.8	620.6	19	11.597	Positive	[M+NH4]+	-FA 18:1(+HO)-(NH3)
TG 18:1_18:1_19:2 d5	919.8	608.6	35	11.597	Positive	[M+NH4]+	-FA 19:2(+HO)-(NH3)
TG 18:1_18:1_21:2 d5	947.9	648.6	35	11.883	Positive	[M+NH4]+	-FA 18:1(+HO)-(NH3)
TG 18:1_18:1_21:2 d5	947.9	608.6	31	11.883	Positive	[M+NH4]+	-FA 21:2(+HO)-(NH3)
